# Supplementary material for: Machine learning derived development and validation of extracellular matrix related signature for predicting prognosis in adolescents and young adults glioma
Source: Sci Rep. 2025 Aug 7;15:28926. doi: 10.1038/s41598-025-13547-6 (PMC12331974; doi:10.1038/s41598-025-13547-6)
Supplement: Supplementary file 2 — Supplementary Material 2 [file 41598_2025_13547_MOESM2_ESM.xlsx]

## Sheet: Supplementary Table 1
Supplementary Table 1 - List of extracellular matrix genes
BDNF
BGLAP
BGN
S100A1
S100A10
S100A11
S100A12
S100A13
S100A2
S100A3
S100A4
S100A5
S100A6
S100A7
S100A8
S100A9
S100B
S100P
SERPINB3
SERPINB4
CLEC11A
CCL1
CCL11
CCL13
CCL14
CCL15
CCL16
CCL17
CCL18
CCL19
CCL2
CCL20
CCL21
CCL22
CCL23
CCL24
CCL25
CCL26
CCL27
CCL3
CCL4
CCL5
CCL7
CCL8
CXCL10
CXCL11
CXCL13
CXCL14
CXCL5
CXCL6
XCL1
XCL2
CX3CL1
SDC1
SDC2
SDC3
SDC4
BMP1
CXCL12
BMP15
BMP2
BMP3
BMP4
BMP5
SEMA3A
SEMA3B
SEMA3C
SEMA3D
SEMA3E
SEMA3F
SEMA4A
BMP6
SEMA4B
SEMA4C
SEMA4D
SEMA4F
SEMA4G
SEMA5A
SEMA5B
SEMA6A
SEMA6B
BMP7
SEMA6C
SEMA7A
BMP8B
SFRP1
SFRP2
SFRP4
SFRP5
SFTPA1
SFTPA2
SFTPB
SFTPC
SFTPD
SHH
SLIT1
SLIT2
SLIT3
SLPI
BTC
SPAM1
SPARC
SPARCL1
SPOCK1
SPON1
SPON2
SPP1
SRPX
ST14
IL24
SERPINA7
TDGF1
TECTA
TECTB
TGFA
TGFB1
TGFB2
TGFB3
TGFBI
TGM1
TGM2
TGM3
TGM4
TGM5
THBS1
THBS2
THBS3
THBS4
TCHH
THPO
TIMP1
TIMP2
TIMP3
TIMP4
TLL1
TLL2
CLEC3B
TNF
TNFAIP6
TNFSF10
TNFSF11
TNFSF12
TNFSF13
TNFSF13B
TNFSF14
TNFSF15
TNFSF18
TNFSF4
FASLG
TNFSF8
TNFSF9
TNR
TNXB
TPO
SERPING1
CRNN
EGLN1
C1QA
C1QB
C1QC
USH2A
TSPEAR
VEGFA
VEGFB
VEGFC
VIT
VTN
VWF
CCN4
CCN5
CCN6
WNT1
WNT10B
WNT11
WNT9A
WNT9B
WNT2
WNT2B
WNT3
WNT4
WNT5A
WNT6
WNT7A
WNT7B
WNT8A
WNT8B
ZP1
ZP2
ZP3
ADAMTS10
ADAMTS9
CLEC4A
CLEC4C
CST9
MEPE
NID2
SCUBE1
CLEC4M
SPOCK2
SPOCK3
ADIPOQ
SCUBE3
NTN4
ADAMTS13
BRINP2
IL25
WNT10A
LOXL3
SERPINB7
VWA7
EGFL8
SERPINB12
SERPINB11
MMP25
MMP26
MMP27
NTNG2
C1QTNF1
C1QTNF2
C1QTNF3
C1QTNF7
C1QTNF6
C1QTNF5
C1QTNF4
CLEC2D
MMP21
S100G
MUC19
MMP28
ELSPBP1
CLEC4D
CLEC4E
CLEC6A
CLEC7A
TINAG
ADAMTS12
PAPPA2
CRELD1
ADAMTSL2
ADAMTSL1
ADAMTSL3
EGLN2
EGLN3
COL20A1
COL5A3
HHIP
ASPN
ADAMTS14
IL22
MUC15
PXDN
ZFP91
SERPINA6
CBLN1
CBLN2
LGALS13
SERPINH1
ADAM33
ADAM32
IL23A
IL1F10
IL36RN
IL36A
IL37
IL36B
MUC16
IL36G
ZP4
LGALS12
CELA3A
CELA3B
CSTL1
CST11
WNT3A
SVEP1
SERPINA9
SERPINA10
SERPINA3
COLEC12
ANGPTL4
EMCN
EMILIN3
RSPO4
ISM1
CBLN4
CST9L
TGM6
WNT5B
WNT16
ADAMDEC1
ADAMTS15
IL17F
CD209
SEMA6D
MUC17
CLEC10A
POSTN
COL21A1
ADAMTS16
ADAMTS17
ADAMTS18
ADAMTS19
IL26
LOXL4
CRLF3
ADAMTS20
COLEC11
ABI3BP
OPRPN
HAPLN2
CLCF1
EPGN
KCP
NGLY1
CCL28
EMID1
COL26A1
WIF1
IFNE
CRISPLD1
ITLN1
CFC1
SERPINA12
IMPG2
HPSE2
SFTA2
SFTA3
COL25A1
LGI2
LGI3
LGI4
FBN3
ADAM10
CTHRC1
ADAM11
S100A14
ADAM12
CHAD
TINAGL1
FRAS1
SERPINA11
HMCN1
PAPLN
ADAM15
P3H1
P3H2
P3H3
C1QL3
CHRD
ADAM17
ADAM18
FGFBP1
ADAM19
ANGPTL5
ADAMTSL4
ADAM2
CILP
CLEC14A
EMILIN1
EMILIN2
MMRN2
ADAM20
ADAM21
GREM1
IGFBPL1
ADAM22
CLC
CBLN3
ADAM23
SMOC1
SMOC2
SULF1
SULF2
S100A16
CLEC3A
CLEC2B
CLEC5A
EGFL7
ITLN2
ADAM28
ADAM29
ADAM30
COL24A1
HRNR
RSPO3
BMP10
PLXDC1
PLXDC2
FNDC1
HMCN2
ADAM7
HAPLN3
ITIH5
ADAM8
EYS
ADAM9
BMP8A
S100A7L2
S100A7A
MUC21
RSPO1
CD109
CNTF
ADAMTS1
IFNK
ADAMTS2
COCH
COL10A1
COL11A1
COL11A2
COL12A1
VWDE
ADAMTS3
COL13A1
COL14A1
COL15A1
COL16A1
COL17A1
COL18A1
COL19A1
CLEC2L
COL1A1
COL1A2
SSPOP
ADAMTS4
COL2A1
COL3A1
COL4A1
COL4A2
COL4A3
COL4A4
COL4A5
COL4A6
COL5A1
ADAMTS5
COL5A2
COL6A1
COL6A2
COL6A3
COL7A1
FAM20C
COL8A1
COL8A2
COL9A1
COL9A2
COL9A3
ADAMTS6
COLEC10
COLQ
COMP
ADAMTS7
BRINP3
ADAMTS8
COL28A1
TNN
REG4
COL27A1
COL22A1
COL23A1
FAM20A
FAM20B
HMSD
BCAN
CPN2
ANGPTL6
PODN
ISM2
CPAMD8
MUC20
NTNG1
ANXA8L1
A2ML1
FREM1
FGFBP3
CRHBP
CRIM1
CRLF1
HAPLN1
INHBE
CCL4L2
ANGPTL7
BMPER
CHRDL2
C1QL2
C1QL1
CLEC2A
CILP2
CSF1
CSF2
CLEC1A
CLEC1B
CSF3
CSH1
CSH2
CSHL1
PARM1
PAMR1
CLEC4G
CELA2A
VCAN
NCAN
CSPG4
CSPG5
SNED1
VWA2
CST1
CST2
CST3
CST4
CST5
SERPINE3
CST6
CST7
CST8
CSTA
CSTB
LGALS9B
PIK3IP1
HCFC2
CTF1
CCN2
LGALSL
VWA5B2
CHADL
FREM3
NTN5
CRISPLD2
CTSB
CTSC
FNDC8
CTSD
CTSE
CTSF
CTSG
CTSH
CLEC4F
CTSK
CTSL
INTS14
CTSV
FREM2
CTSO
CTSS
CTSW
KAZALD1
CTSZ
OGFOD1
OGFOD2
THSD4
NDNF
PODNL1
PXDNL
IGSF10
VWCE
VWA5B1
CCN1
KY
FNDC7
COL6A5
CLEC9A
FBLN7
RPTN
EGFLAM
HTRA4
ZPLD1
COL6A6
DCN
VWA3A
CDCP2
INTS6L
NPNT
C17orf58
ADAMTSL5
CRELD2
VWA3B
IL34
CLEC18C
RSPO2
DHH
C1QTNF9
TSKU
P4HTM
ITIH6
DMBT1
DMP1
ELFN2
CCBE1
FGFBP2
LRG1
GLDN
REG3G
MEGF10
MEGF11
MFAP5
CHRDL1
NRG4
OIT3
CELA2B
LGALS14
DPT
P4HA3
GDF15
VWC2
AEBP1
SBSPON
S100Z
CLEC18A
SEMA3G
HTRA3
SCUBE2
EPYC
DSPP
CCL3L3
MUCL1
HBEGF
PDGFD
SRPX2
TGM7
VWA1
WFIKKN1
WFIKKN2
LEFTY2
EBI3
HAPLN4
C1QTNF8
C1QL4
ECM1
ECM2
EDA
ASTL
CLEC12A
EDIL3
TCHHL1
ACAN
CLEC12B
EFEMP1
EFEMP2
EGF
MEGF6
MEGF8
MEGF9
EGFL6
AGRN
CELA1
ELANE
SERPINB1
ELFN1
ELN
FLG2
AGT
INS-IGF2
CLEC18B
LGALS9C
BSPH1
CFC1B
OTOL1
C1QTNF9B
EPO
EREG
CLEC17A
CLEC19A
ESM1
F10
F12
F13A1
F13B
F2
F7
F9
FBLN1
FBLN2
FBLN5
FBN1
FBN2
FCN1
FCN2
FCN3
FGA
FGB
FGF1
FGF10
FGF11
FGF12
FGF13
FGF14
FGF16
FGF17
FGF18
FGF19
FGF2
FGF20
FGF21
FGF22
FGF23
FGF3
FGF4
FGF5
FGF6
FGF7
FGF8
FGF9
FGG
FGL1
FGL2
VEGFD
VWC2L
FLG
FLT3LG
FMOD
FN1
FRZB
FST
FSTL1
FSTL3
MUC22
LGALS16
GAS6
GDF1
GDF10
GDF11
GDF2
GDF3
GDF5
GDF6
GDF7
MSTN
GDF9
GDNF
GH1
GH2
GPC1
GPC2
GPC3
GPC4
GPC5
GPC6
AMBN
AMBP
GRIFIN
CXCL1
CXCL2
CXCL3
AMELX
AMELY
AMH
HABP2
SERPIND1
HCFC1
ANGPT1
ANGPT2
ANGPT4
ANGPTL1
HGF
HGFAC
ANGPTL2
ANGPTL3
HPSE
HPX
HRG
HSPG2
TNC
HYAL1
HYAL2
HYAL3
HYAL4
ANXA1
ANXA10
IBSP
ANXA11
ANXA13
ANXA2
ANXA3
IFNA1
IFNA10
IFNA13
ANXA4
IFNA14
IFNA16
IFNA17
IFNA2
IFNA21
IFNA4
IFNA5
IFNA6
IFNA7
IFNA8
ANXA5
IFNB1
IFNG
ANXA6
IFNW1
ANXA7
ANXA8
IGF1
IGF2
IGFALS
IGFBP1
ANXA9
IGFBP2
IGFBP3
IGFBP4
IGFBP5
IGFBP6
IGFBP7
IHH
IL10
IL11
IL12A
IL12B
IL13
IL15
IL16
IL17A
IL17B
IL17C
IL17D
IL18
IL19
IL1A
IL1B
IL1RN
IL2
IL20
IL3
IL4
IL5
IL6
IL7
CXCL8
IL9
IMPG1
INHA
INHBA
INHBB
INHBC
INS
INSL3
INSL5
INSL6
ITIH1
ITIH2
ITIH3
ITIH4
ANOS1
KERA
KITLG
KNG1
LAMA1
LAMA2
LAMA3
LAMA4
LAMA5
LAMB1
LAMB2
LAMB3
LAMB4
LAMC1
LAMC2
LAMC3
AREG
LEFTY1
LEP
LGALS1
LGALS2
LGALS3
LGALS4
LGALS7
LGALS8
LGALS9
LGI1
LIF
LMAN1
LMAN1L
VWA5A
LOX
LOXL1
LOXL2
LPA
LTA
LTB
LTBP1
LTBP2
LTBP3
LTBP4
LUM
MASP1
MASP2
MATN1
MATN2
MATN3
MATN4
MBL2
MDK
A2M
MEP1A
MEP1B
MFAP1
MFAP2
MFAP3
MFAP4
MFGE8
MGP
CXCL9
MMP1
MMP10
MMP11
MMP12
MMP13
MMP14
MMP15
MMP16
MMP17
MMP19
MMP2
MMP20
MMP23B
MMP24
MMP3
MMP7
MMP8
MMP9
MMRN1
ARTN
MST1
MST1L
MUC1
MUC12
MUC13
MUC2
MUC3A
MUC4
MUC5AC
MUC5B
MUC6
MUC7
MXRA5
SERPINC1
NELL1
NELL2
NGF
NID1
NODAL
CCN3
NRG1
NRG2
NRG3
NRTN
NTF3
NTF4
NTN1
NTN3
NYX
OGN
OMD
OPTC
OSM
OTOG
OVGP1
P4HA1
P4HA2
PCSK6
SERPINE1
SERPINB2
REG3A
PAPPA
SERPINA5
PCOLCE
PCOLCE2
PCSK5
PDGFA
PDGFB
PDGFC
SERPINF1
PF4
PF4V1
PGF
SERPINA1
SERPINB10
SERPINI1
SERPINB13
SERPINI2
PI3
SERPINA4
SERPINB5
SERPINB6
SERPINE2
SERPINB8
SERPINB9
SERPINA2
PLAT
PLAU
PLG
SERPINF2
PLOD1
PLOD2
PLOD3
PLXNA1
PLXNA2
PLXNA3
PLXNA4
PLXNB1
PLXNB2
PLXNB3
PLXNC1
PLXND1
POMZP3
PPBP
CTSA
PRELP
SRGN
PRG2
PRG3
PRG4
PRL
PRSS1
HTRA1
PRSS12
PRSS2
PRSS3
TMPRSS15
PSPN
PTN
PZP
REG1A
REG1B
RELN

## Sheet: Supplementary Table 2
Supplementary Table 2 - The datasets used in this study
Name	URL
TCGA-GBMLGG	https://xenabrowser.net/datapages/
CGGA-693	https://www.cgga.org.cn/
CGGA-325	https://www.cgga.org.cn/
GTEx-brain	https://xenabrowser.net/datapages/
ECM-genes	https://pubmed.ncbi.nlm.nih.gov/36915600/
Pan-cancer	https://xenabrowser.net/datapages/
PRJNA482620	http://tiger.canceromics.org/
IMvigor 210	http://research-pub.gene.com/IMvigor210CoreBiologies/
GSE91061	http://tiger.canceromics.org/
GSE78220	http://tiger.canceromics.org/

## Sheet: Supplementary Table 3
Supplementary Table 3 - Prognositc genes and coefficients in MLDPS
Genes	Coefficients
ADAM11	0.0138133
ADAM17	0.0114573
ADAM29	-0.19342
ADAM32	0.123254
ADAM9	0.00571943
ADAMDEC1	-0.0538466
ADAMTS1	-0.00260591
ADAMTS14	0.0247096
ADAMTS15	0.0111145
ADAMTS16	0.0324012
ADAMTS18	-0.0452452
ADAMTSL4	0.01323
ADAMTSL5	-0.0552544
AGT	-0.00845615
ANGPTL4	0.0515949
ANGPTL7	0.0198628
ANXA3	-0.0331059
ARTN	0.0468033
BMP2	-0.0482096
BMP5	0.0798138
BMP8A	0.0997319
C1QC	0.0121087
C1QL2	0.00461695
C1QTNF4	0.00694211
CBLN2	-0.000570017
CBLN3	-0.0159883
CCL17	-0.149397
CCL2	-0.0108119
CCL20	-0.0619307
CDCP2	0.0402778
CHRD	0.0376833
CLEC2L	-0.0042093
CLEC4F	-0.0263553
CLEC4G	0.000737985
COCH	0.0151604
COL11A2	-0.0479097
COL14A1	-0.0350703
COL17A1	-0.0296114
COL1A1	-0.010133
COL22A1	0.0225347
COL27A1	0.0151752
COL3A1	0.00255292
COL4A1	0.0207257
COL4A2	0.0251179
COL4A6	0.00600563
COL7A1	-0.0111617
COL9A1	0.0121811
COL9A3	0.0462191
COLEC11	0.0377963
CPAMD8	-0.0328244
CRHBP	-0.0165895
CRISPLD1	-0.00350201
CSPG4	-0.0191331
CTSC	-0.00772517
CTSS	-0.0387956
CXCL11	-0.0689536
CXCL14	-0.0405911
ECM2	0.0443767
EGFL6	0.110206
EGFL7	0.00774855
ESM1	0.00589885
F13A1	-0.0382622
FBLN7	-0.0286098
FBN2	0.0162753
FCN3	0.0128797
FGF11	-0.0701227
FGF13	0.00860819
FGF22	-0.0440978
FN1	0.0139224
FREM2	0.0578589
GPC2	0.0639823
GPC4	-0.00118008
GPC6	-0.0446263
HAPLN1	-0.0731806
HAPLN2	0.00600567
HMCN1	0.0900306
HPSE	-0.00456532
HPX	0.0111489
IBSP	0.0342349
IGFBP2	0.0201769
IGFBP3	0.0242787
IGFBP5	0.0494641
IGFBP6	-0.0362911
IGFBP7	0.0236519
IGFBPL1	0.0946604
IL11	0.0403982
IL15	-0.0206525
IL17B	0.0323615
IL24	-0.130016
IL34	-0.00909427
IL6	-0.0478627
INHA	-0.0334249
ITIH1	0.0497103
ITIH4	-0.0257104
KCP	0.0558207
LAMA3	-0.195214
LAMC2	0.0783203
LEFTY2	0.0317973
LGALS8	0.0169197
LGI2	0.0695468
LGI3	-0.00516242
LOXL2	0.036903
LOXL3	0.0593448
LTBP1	-0.00476515
MASP1	-0.0146605
MASP2	-0.000208411
MATN2	-0.0136163
MFAP2	0.0384358
MGP	0.00658202
MMP1	0.0348402
MMP14	0.0284165
MMP16	0.024559
MMP19	-0.0029068
MMP2	0.00272449
MMP21	0.0595584
MMP7	-0.00805212
MMRN1	0.0440962
MSTN	0.0589251
MXRA5	-0.0193264
NID1	0.0256843
NID2	0.0468855
NTF3	0.0880148
NTN1	0.0412007
OIT3	0.0113088
OSM	0.00173511
P4HA3	-2.21e-05
PLAU	0.00318932
PLXDC1	0.0377682
PLXDC2	-0.0430019
PODNL1	0.0164733
PRSS3	0.0075794
PXDN	0.00427017
PZP	0.326358
S100A1	0.0129761
S100A3	0.0529211
S100A8	0.00618205
S100A9	-0.000854809
SDC3	0.0320341
SEMA3B	-0.0209279
SEMA3F	-0.00594328
SEMA3G	-0.0930293
SEMA4A	-0.0460933
SEMA5A	0.00657397
SEMA6A	0.0250197
SERPINA3	0.0367568
SERPINE1	0.00876162
SERPINI1	0.00410186
SFRP1	0.0483476
SFRP2	-0.0195696
SFRP4	-0.0149663
SFTPC	-0.0186146
SLIT1	-0.0057961
SMOC1	-4.49e-05
SPOCK3	-0.00409941
SPON2	0.00927721
SRPX2	-0.000369279
ST14	0.0154581
SULF1	-0.0063637
SULF2	-0.0425789
SVEP1	0.112377
TGFB3	-0.0608549
TGFBI	-0.0215115
THPO	-0.0727472
TINAGL1	-0.0292873
TNC	0.0404456
TNFSF14	-0.0110661
TNFSF8	-0.0787648
TNR	-0.027707
TPO	0.18085
TSKU	0.0231378
USH2A	0.748846
VEGFC	0.0288767
VTN	-0.0703454
VWA3A	-0.0141337
VWA5B1	0.219819
VWA5B2	-0.0073598
VWC2	-0.086055
WFIKKN1	-0.000227489
WNT10B	-0.0100126
WNT16	0.0540706
WNT2B	0.0299085
WNT5A	-0.0237857
WNT6	0.0710336
XCL1	-0.0768364

## Sheet: Supplementary Table 4
Supplementary Table 4 - The formula for calculating MLDPS score
MLDPS score = expr(gene1) × β(gene1) + expr(gene1) × β(gene1) + expr(gene1) × β(gene1) +...+ expr(genen) × β(genen). Specifically, MLDPS score was calculated by a linear combination of the expression levels of prognostic genes multiply by corresponding coefficient (β).

## Sheet: Supplementary Table 5
Supplementary Table 5 - Metadata of the AYAs cohorts
CGGA-693					CGGA-325					TCGA
ID	OS (day)	Status	MLDPS score	Group	ID	OS (day)	Status	MLDPS score	Group	ID	OS (day)	Status	MLDPS score	Group
CGGA_1017	768	1	0.455327	Low MLDPS	CGGA_1013	1725	1	0.527087	Low MLDPS	TCGA-06-0129	1024	1	8.67289	High MLDPS
CGGA_1048	703	0	1.04741	High MLDPS	CGGA_1020	1120	1	0.532513	Low MLDPS	TCGA-06-0178	2681	1	6.47308	High MLDPS
CGGA_1058	995	1	0.83365	High MLDPS	CGGA_1027	2688	0	0.884381	High MLDPS	TCGA-06-0221	603	1	7.28786	High MLDPS
CGGA_106	5028	0	0.40636	Low MLDPS	CGGA_1031	2457	1	0.204202	Low MLDPS	TCGA-06-0882	632	1	7.01911	High MLDPS
CGGA_1066	723	1	1.55722	High MLDPS	CGGA_1034	753	1	1.00442	High MLDPS	TCGA-06-2570	958	0	8.90392	High MLDPS
CGGA_107	2156	1	2.26144	High MLDPS	CGGA_1046	3559	0	0.621033	Low MLDPS	TCGA-06-5416	204	0	8.77217	High MLDPS
CGGA_1087	701	0	0.0119836	Low MLDPS	CGGA_1068	68	1	2.05525	High MLDPS	TCGA-12-0616	448	1	10.1854	High MLDPS
CGGA_1097	1378	1	1.32021	High MLDPS	CGGA_1070	333	1	2.23087	High MLDPS	TCGA-12-3653	442	1	7.68469	High MLDPS
CGGA_1101	214	1	2.33958	High MLDPS	CGGA_1072	1090	1	1.64522	High MLDPS	TCGA-15-1444	1537	1	7.30868	High MLDPS
CGGA_1103	585	1	2.45423	High MLDPS	CGGA_1079	471	1	0.845076	Low MLDPS	TCGA-27-1837	427	1	8.61868	High MLDPS
CGGA_1106	420	1	2.43612	High MLDPS	CGGA_1081	216	1	2.37179	High MLDPS	TCGA-27-2521	510	1	9.65913	High MLDPS
CGGA_1108	684	1	2.13656	High MLDPS	CGGA_1095	2778	1	2.33422	High MLDPS	TCGA-CS-4943	1106	1	5.31976	Low MLDPS
CGGA_112	1534	1	0.594449	Low MLDPS	CGGA_1105	609	1	1.67344	High MLDPS	TCGA-CS-5393	1222	0	4.66765	Low MLDPS
CGGA_1121	3278	0	0.319784	Low MLDPS	CGGA_1113	1265	1	1.66826	High MLDPS	TCGA-CS-6290	1137	1	5.04292	Low MLDPS
CGGA_1127	2630	1	-0.514325	Low MLDPS	CGGA_1118	398	1	1.3317	High MLDPS	TCGA-CS-6666	1428	0	5.96018	High MLDPS
CGGA_1130	402	1	0.922079	High MLDPS	CGGA_1129	168	1	2.18447	High MLDPS	TCGA-CS-6667	1469	0	4.1619	Low MLDPS
CGGA_1132	3251	0	-0.0529298	Low MLDPS	CGGA_1136	236	1	1.65077	High MLDPS	TCGA-CS-6669	1494	0	6.21755	High MLDPS
CGGA_1144	2505	0	0.0564583	Low MLDPS	CGGA_1146	2498	0	1.36619	High MLDPS	TCGA-DB-5270	3733	0	5.79641	High MLDPS
CGGA_1147	3215	0	0.292772	Low MLDPS	CGGA_1170	346	1	2.31299	High MLDPS	TCGA-DB-5273	2493	0	6.30799	High MLDPS
CGGA_1148	596	1	1.60924	High MLDPS	CGGA_1175	441	1	2.31242	High MLDPS	TCGA-DB-5274	2289	0	4.12313	Low MLDPS
CGGA_1154	369	1	0.985378	High MLDPS	CGGA_1188	256	1	1.39549	High MLDPS	TCGA-DB-5275	1458	0	5.72976	High MLDPS
CGGA_1158	3188	0	-0.254143	Low MLDPS	CGGA_1189	3082	0	-0.0244793	Low MLDPS	TCGA-DB-5276	2218	0	8.05542	High MLDPS
CGGA_1161	3180	0	-0.116031	Low MLDPS	CGGA_1231	2279	1	1.41987	High MLDPS	TCGA-DB-5277	1547	1	5.40006	High MLDPS
CGGA_1162	3174	0	-0.449168	Low MLDPS	CGGA_1234	705	1	2.26701	High MLDPS	TCGA-DB-5278	2772	0	3.4735	Low MLDPS
CGGA_1164	1022	1	0.235293	Low MLDPS	CGGA_1271	523	1	2.71606	High MLDPS	TCGA-DB-A4X9	1412	0	5.88062	High MLDPS
CGGA_1169	1765	1	0.678498	Low MLDPS	CGGA_1272	124	1	2.96589	High MLDPS	TCGA-DB-A4XA	573	0	2.61956	Low MLDPS
CGGA_1172	3131	0	0.520247	Low MLDPS	CGGA_1287	533	1	1.90508	High MLDPS	TCGA-DB-A4XB	919	0	6.55485	High MLDPS
CGGA_1181	318	0	0.466858	Low MLDPS	CGGA_1292	2901	0	1.70878	High MLDPS	TCGA-DB-A4XC	1421	0	4.94432	Low MLDPS
CGGA_1183	408	1	2.11357	High MLDPS	CGGA_1307	965	0	1.72921	High MLDPS	TCGA-DB-A4XD	1210	0	6.11572	High MLDPS
CGGA_1198	3066	0	0.559155	Low MLDPS	CGGA_1314	172	1	2.39926	High MLDPS	TCGA-DB-A4XE	1139	0	6.27063	High MLDPS
CGGA_1208	161	1	2.23532	High MLDPS	CGGA_1320	59	1	2.50171	High MLDPS	TCGA-DB-A4XG	2219	0	4.83993	Low MLDPS
CGGA_1212	2292	1	0.860109	High MLDPS	CGGA_1340	1109	1	2.30557	High MLDPS	TCGA-DB-A64Q	182	0	3.36247	Low MLDPS
CGGA_1226	670	1	1.1571	High MLDPS	CGGA_1343	94	1	2.89132	High MLDPS	TCGA-DB-A64R	955	0	3.93489	Low MLDPS
CGGA_1228	2626	0	0.427912	Low MLDPS	CGGA_1374	141	1	1.28839	High MLDPS	TCGA-DB-A64S	835	0	6.19688	High MLDPS
CGGA_1232	2067	1	0.689007	High MLDPS	CGGA_1381	46	1	2.73304	High MLDPS	TCGA-DB-A64U	846	0	4.10902	Low MLDPS
CGGA_1235	3004	0	-0.309909	Low MLDPS	CGGA_1384	191	1	1.32269	High MLDPS	TCGA-DB-A75L	342	0	6.14069	High MLDPS
CGGA_1260	177	1	1.44089	High MLDPS	CGGA_1388	485	1	1.12766	High MLDPS	TCGA-DB-A75O	935	0	5.4424	High MLDPS
CGGA_1264	2929	0	-0.158097	Low MLDPS	CGGA_1394	139	1	1.53376	High MLDPS	TCGA-DB-A75P	492	0	7.75379	High MLDPS
CGGA_1269	2923	0	-0.121222	Low MLDPS	CGGA_1406	2154	1	1.06452	High MLDPS	TCGA-DH-5140	607	1	8.21293	High MLDPS
CGGA_1282	1116	1	1.32655	High MLDPS	CGGA_1409	2727	0	0.687089	Low MLDPS	TCGA-DH-5141	968	0	2.31771	Low MLDPS
CGGA_1300	1793	1	1.15393	High MLDPS	CGGA_1450	957	1	0.900674	High MLDPS	TCGA-DH-5142	1943	0	5.48591	High MLDPS
CGGA_1311	1080	1	0.438245	Low MLDPS	CGGA_1475	182	1	2.6666	High MLDPS	TCGA-DH-5143	1401	0	5.44109	High MLDPS
CGGA_1318	1497	0	1.33193	High MLDPS	CGGA_235	2340	1	-0.268195	Low MLDPS	TCGA-DH-A7UT	531	1	7.12294	High MLDPS
CGGA_1334	146	1	1.50168	High MLDPS	CGGA_241	4809	0	-0.224484	Low MLDPS	TCGA-DU-5847	548	0	6.47419	High MLDPS
CGGA_1350	2819	0	0.246199	Low MLDPS	CGGA_243	2977	0	-0.0223629	Low MLDPS	TCGA-DU-5853	407	0	4.3945	Low MLDPS
CGGA_1359	343	1	2.44556	High MLDPS	CGGA_245	318	1	1.33604	High MLDPS	TCGA-DU-5871	576	0	5.53878	High MLDPS
CGGA_1369	360	0	-0.213967	Low MLDPS	CGGA_252	165	0	0.527788	Low MLDPS	TCGA-DU-6392	6423	0	7.97864	High MLDPS
CGGA_1377	2780	0	0.394546	Low MLDPS	CGGA_254	4793	0	-0.0192027	Low MLDPS	TCGA-DU-6395	1491	1	2.95911	Low MLDPS
CGGA_1386	2770	0	-0.830783	Low MLDPS	CGGA_256	158	0	0.598611	Low MLDPS	TCGA-DU-6396	2286	1	7.26427	High MLDPS
CGGA_1401	1680	1	0.747026	High MLDPS	CGGA_261	4130	0	0.435703	Low MLDPS	TCGA-DU-6401	2660	1	4.48522	Low MLDPS
CGGA_1402	2742	0	1.60009	High MLDPS	CGGA_267	1374	1	0.493878	Low MLDPS	TCGA-DU-6408	3470	1	5.16573	Low MLDPS
CGGA_1407	2728	0	-0.281847	Low MLDPS	CGGA_273	2635	1	0.246722	Low MLDPS	TCGA-DU-6542	73	0	6.52067	High MLDPS
CGGA_1410	825	1	2.34193	High MLDPS	CGGA_300	2199	1	0.710966	Low MLDPS	TCGA-DU-7007	1915	1	7.64763	High MLDPS
CGGA_1413	2720	0	-0.158241	Low MLDPS	CGGA_314	2568	1	-0.153266	Low MLDPS	TCGA-DU-7009	4695	1	3.4618	Low MLDPS
CGGA_1415	2719	0	0.606851	Low MLDPS	CGGA_374	493	1	1.75513	High MLDPS	TCGA-DU-7011	3200	1	3.93727	Low MLDPS
CGGA_1421	2699	0	-0.208695	Low MLDPS	CGGA_400	1321	1	1.27788	High MLDPS	TCGA-DU-7019	800	0	4.97148	Low MLDPS
CGGA_1425	640	1	2.09047	High MLDPS	CGGA_446	4508	0	0.288989	Low MLDPS	TCGA-DU-7298	576	1	5.82274	High MLDPS
CGGA_1427	339	0	0.131782	Low MLDPS	CGGA_479	4445	0	0.0260715	Low MLDPS	TCGA-DU-7299	1339	1	7.46152	High MLDPS
CGGA_1430	162	1	3.3808	High MLDPS	CGGA_485	2437	0	-0.342644	Low MLDPS	TCGA-DU-8163	629	0	5.65015	High MLDPS
CGGA_1440	2670	0	-0.172907	Low MLDPS	CGGA_488	435	1	2.25848	High MLDPS	TCGA-DU-8166	516	0	4.42984	Low MLDPS
CGGA_1445	2664	0	1.19477	High MLDPS	CGGA_490	3804	0	-0.30795	Low MLDPS	TCGA-DU-A5TP	1012	0	7.65879	High MLDPS
CGGA_1446	2664	0	0.293545	Low MLDPS	CGGA_491	1074	1	1.27465	High MLDPS	TCGA-DU-A5TW	760	0	5.33164	Low MLDPS
CGGA_1472	1025	1	1.89005	High MLDPS	CGGA_493	2382	1	0.298364	Low MLDPS	TCGA-DU-A6S2	777	0	4.77935	Low MLDPS
CGGA_1473	265	1	3.13624	High MLDPS	CGGA_502	4414	0	0.393591	Low MLDPS	TCGA-DU-A6S6	2893	0	3.91229	Low MLDPS
CGGA_1482	2592	0	-0.573929	Low MLDPS	CGGA_518	212	1	1.03642	High MLDPS	TCGA-DU-A6S7	638	0	4.60235	Low MLDPS
CGGA_1488	2586	0	0.101814	Low MLDPS	CGGA_541	4376	0	0.639496	Low MLDPS	TCGA-DU-A76O	522	0	4.3116	Low MLDPS
CGGA_1491	246	1	2.65661	High MLDPS	CGGA_545	555	1	1.4727	High MLDPS	TCGA-DU-A7T8	4229	1	6.57887	High MLDPS
CGGA_1494	269	1	1.645	High MLDPS	CGGA_601	1133	1	0.76227	Low MLDPS	TCGA-DU-A7TA	2565	0	7.86912	High MLDPS
CGGA_1497	1178	1	1.85337	High MLDPS	CGGA_603	168	0	1.36667	High MLDPS	TCGA-DU-A7TC	1137	0	4.28176	Low MLDPS
CGGA_1502	2565	0	0.175712	Low MLDPS	CGGA_607	1389	0	0.258153	Low MLDPS	TCGA-DU-A7TI	1183	1	5.38806	High MLDPS
CGGA_1505	172	1	3.02073	High MLDPS	CGGA_632	576	1	1.21746	High MLDPS	TCGA-E1-5303	2052	1	4.63945	Low MLDPS
CGGA_1508	1049	1	1.00913	High MLDPS	CGGA_642	4249	0	0.268074	Low MLDPS	TCGA-E1-5305	2433	1	5.44847	High MLDPS
CGGA_1513	2352	1	-0.518721	Low MLDPS	CGGA_655	4231	0	-0.391575	Low MLDPS	TCGA-E1-5311	4084	1	5.52371	High MLDPS
CGGA_1518	411	1	2.25679	High MLDPS	CGGA_671	4215	0	-0.177262	Low MLDPS	TCGA-E1-5322	3978	1	6.56305	High MLDPS
CGGA_1524	1004	1	0.373186	Low MLDPS	CGGA_675	4210	0	-0.282932	Low MLDPS	TCGA-E1-A7YE	886	1	9.95459	High MLDPS
CGGA_1526	2502	0	0.0134881	Low MLDPS	CGGA_685	3239	1	0.579233	Low MLDPS	TCGA-E1-A7YI	111	1	10.2184	High MLDPS
CGGA_1528	2497	0	-0.366495	Low MLDPS	CGGA_689	4194	0	-0.419901	Low MLDPS	TCGA-E1-A7YV	987	1	8.20554	High MLDPS
CGGA_1542	184	0	0.666981	Low MLDPS	CGGA_694	1194	1	1.03206	High MLDPS	TCGA-E1-A7YW	1120	1	7.73247	High MLDPS
CGGA_1544	208	1	0.705684	High MLDPS	CGGA_700	170	0	0.865226	Low MLDPS	TCGA-E1-A7YY	4445	1	5.88476	High MLDPS
CGGA_1552	2432	0	-0.382085	Low MLDPS	CGGA_704	2572	1	0.732698	Low MLDPS	TCGA-E1-A7Z3	2235	1	6.50595	High MLDPS
CGGA_1553	540	1	0.71324	High MLDPS	CGGA_747	970	1	1.4389	High MLDPS	TCGA-E1-A7Z4	4412	1	5.20595	Low MLDPS
CGGA_1554	824	1	1.42936	High MLDPS	CGGA_752	3680	0	-0.366837	Low MLDPS	TCGA-FG-6689	454	0	4.97835	Low MLDPS
CGGA_1560	459	1	2.01222	High MLDPS	CGGA_759	1263	1	1.40394	High MLDPS	TCGA-FG-6691	1257	0	5.24545	Low MLDPS
CGGA_1563	2423	0	0.400339	Low MLDPS	CGGA_760	4110	0	-0.205863	Low MLDPS	TCGA-FG-7634	467	0	6.526	High MLDPS
CGGA_1565	1417	0	0.178539	Low MLDPS	CGGA_766	4103	0	-0.315983	Low MLDPS	TCGA-FG-7638	686	0	3.37058	Low MLDPS
CGGA_1568	345	0	0.300465	Low MLDPS	CGGA_808	1167	0	1.21008	High MLDPS	TCGA-FG-7641	627	0	4.9657	Low MLDPS
CGGA_1569	1406	0	-0.634245	Low MLDPS	CGGA_812	4035	0	-0.383637	Low MLDPS	TCGA-FG-8181	862	0	5.32528	Low MLDPS
CGGA_157	914	1	0.389914	Low MLDPS	CGGA_834	4013	0	1.56277	High MLDPS	TCGA-FG-8182	416	0	4.3613	Low MLDPS
CGGA_1575	129	1	2.69642	High MLDPS	CGGA_835	517	0	-0.266758	Low MLDPS	TCGA-FG-8185	433	0	4.84459	Low MLDPS
CGGA_1579	2398	0	-0.241446	Low MLDPS	CGGA_838	4011	0	-0.128092	Low MLDPS	TCGA-FG-8187	611	0	3.71531	Low MLDPS
CGGA_1580	1581	1	0.768081	High MLDPS	CGGA_843	4005	0	-0.378127	Low MLDPS	TCGA-FG-8189	685	0	6.33315	High MLDPS
CGGA_1587	750	1	1.92025	High MLDPS	CGGA_864	3977	0	0.109754	Low MLDPS	TCGA-FG-8191	992	0	4.65629	Low MLDPS
CGGA_1588	2003	0	0.49253	Low MLDPS	CGGA_871	3964	0	-0.0760075	Low MLDPS	TCGA-FG-A60K	542	0	3.279	Low MLDPS
CGGA_1592	1588	1	1.01588	High MLDPS	CGGA_892	448	0	-0.501535	Low MLDPS	TCGA-FG-A60L	655	0	4.43391	Low MLDPS
CGGA_1594	480	0	0.465861	Low MLDPS	CGGA_893	3160	1	0.237738	Low MLDPS	TCGA-FG-A70Y	868	0	4.20484	Low MLDPS
CGGA_1595	2363	0	0.131662	Low MLDPS	CGGA_898	1663	1	0.67646	Low MLDPS	TCGA-FG-A711	1481	1	5.93775	High MLDPS
CGGA_1598	564	1	1.93245	High MLDPS	CGGA_904	774	1	0.575834	Low MLDPS	TCGA-FG-A87N	567	0	9.71949	High MLDPS
CGGA_1603	356	1	1.02949	High MLDPS	CGGA_908	2436	1	0.407649	Low MLDPS	TCGA-FN-7833	837	0	4.58012	Low MLDPS
CGGA_1605	321	1	0.348191	Low MLDPS	CGGA_909	3920	0	0.256777	Low MLDPS	TCGA-HT-7468	203	0	3.52583	Low MLDPS
CGGA_1606	471	1	2.72762	High MLDPS	CGGA_D04	3697	0	0.187846	Low MLDPS	TCGA-HT-7469	351	1	12.0002	High MLDPS
CGGA_1607	1333	1	1.47286	High MLDPS	CGGA_D07	3691	0	0.261865	Low MLDPS	TCGA-HT-7470	1220	1	6.20912	High MLDPS
CGGA_1608	1953	0	0.544923	Low MLDPS	CGGA_D15	3669	0	-0.14329	Low MLDPS	TCGA-HT-7473	503	0	4.98223	Low MLDPS
CGGA_1610	1058	1	0.808799	High MLDPS	CGGA_D21	1208	1	1.80457	High MLDPS	TCGA-HT-7476	199	0	6.18479	High MLDPS
CGGA_1611	1158	1	1.47045	High MLDPS	CGGA_D24	837	1	1.12842	High MLDPS	TCGA-HT-7478	194	0	5.57608	High MLDPS
CGGA_1617	2310	0	-0.477754	Low MLDPS	CGGA_D27	3650	0	0.788182	Low MLDPS	TCGA-HT-7480	2287	0	4.97293	Low MLDPS
CGGA_1618	2319	0	-0.130853	Low MLDPS	CGGA_D29	3643	0	-0.165907	Low MLDPS	TCGA-HT-7481	2918	0	4.18547	Low MLDPS
CGGA_1623	2307	0	1.17462	High MLDPS	CGGA_D33	116	1	1.79993	High MLDPS	TCGA-HT-7482	3253	0	4.35264	Low MLDPS
CGGA_1624	87	1	2.75412	High MLDPS	CGGA_D44	313	1	2.66166	High MLDPS	TCGA-HT-7601	153	0	5.86356	High MLDPS
CGGA_1627	2301	0	-0.0145144	Low MLDPS	CGGA_D45	856	0	0.871872	High MLDPS	TCGA-HT-7602	908	0	4.36124	Low MLDPS
CGGA_1630	2160	0	-0.503323	Low MLDPS	CGGA_D46	300	1	2.84095	High MLDPS	TCGA-HT-7603	705	0	4.94906	Low MLDPS
CGGA_1634	366	1	2.28922	High MLDPS	CGGA_D47	1048	1	1.58264	High MLDPS	TCGA-HT-7605	139	0	5.05264	Low MLDPS
CGGA_1649	2225	0	-0.351547	Low MLDPS	CGGA_D48	221	1	0.754912	Low MLDPS	TCGA-HT-7606	526	0	9.00358	High MLDPS
CGGA_165	183	0	0.244135	Low MLDPS	CGGA_D58	181	1	0.786796	Low MLDPS	TCGA-HT-7609	1399	0	4.47921	Low MLDPS
CGGA_1650	1283	1	0.703265	High MLDPS	CGGA_J023	1028	1	2.30015	High MLDPS	TCGA-HT-7610	1706	0	5.5221	High MLDPS
CGGA_1657	2215	0	0.189964	Low MLDPS	CGGA_J024	3410	0	0.70096	Low MLDPS	TCGA-HT-7611	1752	0	4.79385	Low MLDPS
CGGA_1659	387	1	1.62807	High MLDPS	CGGA_J030	3389	0	-0.129088	Low MLDPS	TCGA-HT-7681	1359	0	4.00582	Low MLDPS
CGGA_1670	365	1	2.1056	High MLDPS	CGGA_J042	1409	1	1.6003	High MLDPS	TCGA-HT-7686	1300	0	6.44722	High MLDPS
CGGA_1671	2168	0	1.20936	High MLDPS	Median MLDPS value					TCGA-HT-7695	442	0	3.37747	Low MLDPS
CGGA_1673	2160	0	0.228731	Low MLDPS	0.865226					TCGA-HT-7855	585	0	4.07688	Low MLDPS
CGGA_1675	2154	0	1.23935	High MLDPS						TCGA-HT-7856	1189	0	5.25252	Low MLDPS
CGGA_1685	225	1	1.51912	High MLDPS						TCGA-HT-7858	1540	0	4.68478	Low MLDPS
CGGA_1686	745	1	1.61643	High MLDPS						TCGA-HT-7873	718	0	7.48631	High MLDPS
CGGA_1702	168	1	3.20895	High MLDPS						TCGA-HT-7879	112	0	5.70458	High MLDPS
CGGA_1703	1592	0	-0.110739	Low MLDPS						TCGA-HT-7880	162	0	5.46367	High MLDPS
CGGA_1704	2064	0	0.105567	Low MLDPS						TCGA-HT-7881	1079	0	5.31451	Low MLDPS
CGGA_1714	2034	0	-0.209768	Low MLDPS						TCGA-HT-7902	956	0	7.88761	High MLDPS
CGGA_1716	951	1	2.13542	High MLDPS						TCGA-HT-8012	286	0	3.33879	Low MLDPS
CGGA_1718	1996	0	0.507454	Low MLDPS						TCGA-HT-8013	1933	1	5.14206	Low MLDPS
CGGA_1720	1994	0	0.776619	High MLDPS						TCGA-HT-8019	1004	0	5.33802	High MLDPS
CGGA_1723	1986	0	-0.309499	Low MLDPS						TCGA-HT-8108	76	0	4.46353	Low MLDPS
CGGA_1725	1983	0	0.664763	Low MLDPS						TCGA-HT-8114	1040	0	6.18194	High MLDPS
CGGA_1737	1952	0	-0.440862	Low MLDPS						TCGA-HT-8558	418	0	5.05636	Low MLDPS
CGGA_1747	293	1	0.0792383	Low MLDPS						TCGA-HT-8563	860	0	6.62153	High MLDPS
CGGA_1764	710	1	1.47551	High MLDPS						TCGA-HT-A5R7	615	0	6.44456	High MLDPS
CGGA_1771	1068	1	0.905305	High MLDPS						TCGA-HT-A615	515	0	4.35931	Low MLDPS
CGGA_1776	259	1	1.85853	High MLDPS						TCGA-HT-A616	55	0	4.79111	Low MLDPS
CGGA_1785	329	1	2.33764	High MLDPS						TCGA-HT-A618	512	0	6.11687	High MLDPS
CGGA_1809	343	1	1.94881	High MLDPS						TCGA-HT-A61A	194	0	8.06773	High MLDPS
CGGA_1829	801	0	0.295564	Low MLDPS						TCGA-HT-A61B	533	0	5.96025	High MLDPS
CGGA_1850	750	0	0.213745	Low MLDPS						TCGA-HT-A74J	320	0	6.64186	High MLDPS
CGGA_1854	1626	0	0.561922	Low MLDPS						TCGA-HT-A74L	336	0	4.53909	Low MLDPS
CGGA_1875	1558	0	0.897896	High MLDPS						TCGA-HW-7486	1721	0	3.17468	Low MLDPS
CGGA_1880	1302	0	0.0731673	Low MLDPS						TCGA-HW-7487	1382	0	4.12016	Low MLDPS
CGGA_1882	1531	0	-0.178766	Low MLDPS						TCGA-HW-7489	1262	1	5.75874	High MLDPS
CGGA_1886	338	1	1.7332	High MLDPS						TCGA-HW-7491	2078	0	2.85424	Low MLDPS
CGGA_1902	1479	0	0.595137	Low MLDPS						TCGA-HW-8319	1209	1	6.50554	High MLDPS
CGGA_1903	1474	0	-0.6926	Low MLDPS						TCGA-HW-8320	1217	0	5.07216	Low MLDPS
CGGA_1911	1451	0	1.69648	High MLDPS						TCGA-HW-8321	1294	0	5.38763	High MLDPS
CGGA_1955	457	1	1.3185	High MLDPS						TCGA-HW-8322	758	0	3.86939	Low MLDPS
CGGA_1994	1237	0	-0.239762	Low MLDPS						TCGA-HW-A5KM	630	0	4.89239	Low MLDPS
CGGA_2024	328	1	0.478645	Low MLDPS						TCGA-KT-A74X	438	0	4.08485	Low MLDPS
CGGA_2039	702	0	-0.0912025	Low MLDPS						TCGA-P5-A5EW	204	0	4.48905	Low MLDPS
CGGA_2081	961	0	0.0150831	Low MLDPS						TCGA-P5-A5EY	72	0	6.36178	High MLDPS
CGGA_2106	892	0	1.21502	High MLDPS						TCGA-P5-A5EZ	70	0	6.12825	High MLDPS
CGGA_2115	171	1	1.37329	High MLDPS						TCGA-P5-A5F0	287	0	4.39579	Low MLDPS
CGGA_28	1103	1	0.277044	Low MLDPS						TCGA-P5-A5F1	179	0	4.30181	Low MLDPS
CGGA_290	4725	0	0.0637586	Low MLDPS						TCGA-P5-A5F2	242	0	6.94116	High MLDPS
CGGA_320	3005	1	-0.111031	Low MLDPS						TCGA-P5-A5F4	231	0	4.29751	Low MLDPS
CGGA_358	122	1	0.580679	Low MLDPS						TCGA-P5-A5F6	39	0	12.0603	High MLDPS
CGGA_369	4606	0	0.152941	Low MLDPS						TCGA-P5-A72W	317	0	4.05339	Low MLDPS
CGGA_406	90	1	3.04988	High MLDPS						TCGA-P5-A72X	403	0	5.42788	High MLDPS
CGGA_42	2832	1	0.0906992	Low MLDPS						TCGA-P5-A730	333	0	4.41248	Low MLDPS
CGGA_420	3514	0	0.399115	Low MLDPS						TCGA-P5-A735	292	0	5.97256	High MLDPS
CGGA_457	75	1	2.92577	High MLDPS						TCGA-P5-A77W	584	0	3.39353	Low MLDPS
CGGA_492	652	0	1.81222	High MLDPS						TCGA-P5-A781	134	0	4.34361	Low MLDPS
CGGA_509	623	1	2.55728	High MLDPS						TCGA-QH-A65R	461	0	3.40619	Low MLDPS
CGGA_521	514	1	2.31267	High MLDPS						TCGA-QH-A65S	77	0	6.13102	High MLDPS
CGGA_583	3107	1	0.666122	Low MLDPS						TCGA-QH-A65X	482	0	1.69235	Low MLDPS
CGGA_625	2465	1	-0.0682639	Low MLDPS						TCGA-QH-A6CY	408	0	4.03645	Low MLDPS
CGGA_634	2633	1	0.206746	Low MLDPS						TCGA-QH-A6CZ	279	0	2.33418	Low MLDPS
CGGA_663	4210	0	-0.147692	Low MLDPS						TCGA-QH-A6X3	313	0	3.32527	Low MLDPS
CGGA_703	1355	1	1.42798	High MLDPS						TCGA-QH-A6XA	502	0	4.98591	Low MLDPS
CGGA_707	3299	1	0.100679	Low MLDPS						TCGA-QH-A86X	337	0	3.91927	Low MLDPS
CGGA_724	4147	0	-0.412479	Low MLDPS						TCGA-QH-A870	395	0	5.9987	High MLDPS
CGGA_809	1252	1	0.618729	Low MLDPS						TCGA-RY-A843	63	0	5.05233	Low MLDPS
CGGA_810	551	1	2.2634	High MLDPS						TCGA-S9-A6TU	2650	0	4.90505	Low MLDPS
CGGA_825	836	1	0.907949	High MLDPS						TCGA-S9-A6TZ	1120	0	6.03316	High MLDPS
CGGA_846	2991	0	0.299538	Low MLDPS						TCGA-S9-A6U1	785	0	5.27385	Low MLDPS
CGGA_861	893	1	1.31009	High MLDPS						TCGA-S9-A6U5	992	0	3.34738	Low MLDPS
CGGA_869	537	0	1.27147	High MLDPS						TCGA-S9-A6U6	1069	0	4.56123	Low MLDPS
CGGA_881	252	1	2.90036	High MLDPS						TCGA-S9-A6U8	2988	1	5.1635	Low MLDPS
CGGA_882	1008	0	0.290238	Low MLDPS						TCGA-S9-A6U9	2918	0	4.71707	Low MLDPS
CGGA_888	669	1	1.43357	High MLDPS						TCGA-S9-A6WE	4113	0	4.00553	Low MLDPS
CGGA_889	3943	0	0.13657	Low MLDPS						TCGA-S9-A6WG	2602	0	7.71675	High MLDPS
CGGA_890	2982	1	0.979758	High MLDPS						TCGA-S9-A6WN	805	0	8.0022	High MLDPS
CGGA_903	1455	1	1.24662	High MLDPS						TCGA-S9-A6WO	566	0	5.14615	Low MLDPS
CGGA_D28	860	1	0.846119	High MLDPS						TCGA-S9-A7IS	241	1	9.19489	High MLDPS
CGGA_D50	782	1	1.15193	High MLDPS						TCGA-S9-A7IY	715	0	3.46897	Low MLDPS
CGGA_J50	1693	1	0.893864	High MLDPS						TCGA-S9-A7J0	609	0	9.57035	High MLDPS
CGGA_J73	1134	1	0.716817	High MLDPS						TCGA-S9-A7J2	62	0	3.23583	Low MLDPS
CGGA_P102	1269	1	2.31704	High MLDPS						TCGA-S9-A7QX	564	0	5.93922	High MLDPS
CGGA_P103	1651	0	0.107656	Low MLDPS						TCGA-S9-A7QY	863	0	4.72623	Low MLDPS
CGGA_P104	167	1	1.65142	High MLDPS						TCGA-S9-A7R1	5166	1	4.8793	Low MLDPS
CGGA_P106	71	1	3.22498	High MLDPS						TCGA-S9-A7R3	3013	0	5.01427	Low MLDPS
CGGA_P108	1644	0	1.73293	High MLDPS						TCGA-S9-A7R7	3000	0	8.19674	High MLDPS
CGGA_P109	407	1	2.50286	High MLDPS						TCGA-TM-A7C4	1470	0	6.04026	High MLDPS
CGGA_P113	1708	0	0.193363	Low MLDPS						TCGA-TM-A7C5	1500	0	4.73106	Low MLDPS
CGGA_P115	1626	0	0.970788	High MLDPS						TCGA-TM-A84C	492	1	11.0692	High MLDPS
CGGA_P121	1608	0	-0.180347	Low MLDPS						TCGA-TM-A84I	854	0	10.2913	High MLDPS
CGGA_P156	1488	0	-0.179536	Low MLDPS						TCGA-TM-A84L	1242	1	5.3477	High MLDPS
CGGA_P158	1510	0	0.0561812	Low MLDPS						TCGA-TM-A84Q	772	0	6.9815	High MLDPS
CGGA_P164	1553	0	1.40679	High MLDPS						TCGA-TM-A84S	454	0	3.37442	Low MLDPS
CGGA_P17	1930	0	0.080765	Low MLDPS						TCGA-TM-A84T	724	0	5.76536	High MLDPS
CGGA_P172	1049	1	1.13115	High MLDPS						TCGA-TQ-A7RF	650	0	7.01122	High MLDPS
CGGA_P173	1448	0	0.514256	Low MLDPS						TCGA-TQ-A7RG	599	0	3.47754	Low MLDPS
CGGA_P174	1482	0	-0.280524	Low MLDPS						TCGA-TQ-A7RH	486	0	5.29881	Low MLDPS
CGGA_P176	804	0	-0.152618	Low MLDPS						TCGA-TQ-A7RI	62	0	3.89143	Low MLDPS
CGGA_P181	238	1	1.30333	High MLDPS						TCGA-TQ-A7RJ	1229	0	5.64427	High MLDPS
CGGA_P19	1924	0	0.453932	Low MLDPS						TCGA-TQ-A7RN	1026	0	4.62844	Low MLDPS
CGGA_P21	1922	0	0.317389	Low MLDPS						TCGA-TQ-A7RO	949	0	4.6181	Low MLDPS
CGGA_P265	779	1	1.40833	High MLDPS						TCGA-TQ-A7RQ	795	0	4.71636	Low MLDPS
CGGA_P266	253	1	1.52339	High MLDPS						TCGA-TQ-A7RR	787	0	6.56914	High MLDPS
CGGA_P27	413	0	0.444814	Low MLDPS						TCGA-TQ-A7RW	821	1	5.73438	High MLDPS
CGGA_P283	1331	0	1.2472	High MLDPS						TCGA-VM-A8C9	1314	0	6.04963	High MLDPS
CGGA_P29	103	1	1.54344	High MLDPS						TCGA-VM-A8CE	1191	0	3.63708	Low MLDPS
CGGA_P3	2126	0	0.463223	Low MLDPS						TCGA-VM-A8CH	714	0	5.40862	High MLDPS
CGGA_P308	563	1	0.508719	Low MLDPS						TCGA-VV-A86M	487	0	7.42948	High MLDPS
CGGA_P311	1247	0	0.988648	High MLDPS						TCGA-VW-A7QS	706	0	6.37504	High MLDPS
CGGA_P314	1238	0	0.211996	Low MLDPS						TCGA-WY-A858	1337	0	6.68456	High MLDPS
CGGA_P319	508	1	2.95341	High MLDPS						TCGA-WY-A859	1213	0	6.91791	High MLDPS
CGGA_P356	569	1	0.744755	High MLDPS						TCGA-WY-A85A	1320	0	4.44452	Low MLDPS
CGGA_P385	1112	0	1.06215	High MLDPS						TCGA-WY-A85B	1393	0	4.63138	Low MLDPS
CGGA_P388	293	1	1.76814	High MLDPS						TCGA-WY-A85C	1426	0	6.09032	High MLDPS
CGGA_P392	1099	0	-0.151036	Low MLDPS						Median MLDPS value
CGGA_P401	788	1	1.93956	High MLDPS						5.33164
CGGA_P416	1069	0	0.319978	Low MLDPS
CGGA_P421	308	1	3.03262	High MLDPS
CGGA_P461	599	1	1.64807	High MLDPS
CGGA_P500	930	0	-0.200204	Low MLDPS
CGGA_P501	926	0	0.637963	Low MLDPS
CGGA_P505	924	0	0.339663	Low MLDPS
CGGA_P512	541	1	2.79963	High MLDPS
CGGA_P568	218	1	1.98111	High MLDPS
CGGA_P604	262	1	2.68157	High MLDPS
CGGA_P609	726	0	1.05051	High MLDPS
CGGA_P83	1698	0	-0.212869	Low MLDPS
CGGA_P86	1694	0	-0.117623	Low MLDPS
CGGA_P87	240	1	1.57137	High MLDPS
Median MLDPS value
0.683753

## Sheet: Supplementary Table 6
Supplementary Table 6 - 89 published signatures included in this study
Title	Author	Year	Journal	PMID	DOI	Biological contexts
A Novel Immune Gene-Related Prognostic Score Predicts Survival and Immunotherapy Response in Glioma	Xuehui Luo et al.	2022	Medicinea	36676646	10.3390/medicina59010023	Immune
A Novel DNA Damage Repair-Related Gene Signature for Predicting Glioma Prognosis	Jiaoyang Zhan et al.	2021	International Journal of General Medicine	34992431	10.2147/IJGM.S343839	DNA damage and repair
Identification of a copper metabolism-related gene signature for predicting prognosis and immune response in glioma	Ling Li et al.	2023	Cancer Medicine	36856182	10.1002/cam4.5688	copper metabolism
Construction of a Prognostic Gene Signature Associated with Immune Infiltration in Glioma: A Comprehensive Analysis Based on the CGGA	Xiaoxiang Gong et al.	2021	Journal of Oncology	33790966	10.1155/2021/6620159	Immune infiltration
Identification of an IL-4-Related Gene Risk Signature for Malignancy, Prognosis and Immune Phenotype Prediction in Glioma	Ying Qi et al.	2022	Brain Sciences	35203944	10.3390/brainsci12020181	IL-4-Related
Genomics and Prognosis Analysis of Epithelial-Mesenchymal Transition in Glioma	Chuming Tao et al.	2020	Frontiers in Oncology	32154177	10.3389/fonc.2020.00183	Epithelial-mesenchymal transition
A Prognostic Microenvironment-Related Immune Signature via ESTIMATE (PROMISE Model) Predicts Overall Survival of Patients With Glioma	Huaide Qiu et al.	2020	Frontiers in Oncology	33425732	10.3389/fonc.2020.580263	Tumor microenvironment
Integrative analyses reveal prognostic and immunogenic characteristics of m7G methylation regulators in patients with glioma	Lingwei Tang et al.	2023	American journal of translational research	36777864	2023 Jan 15;15(1):288-309	m7G regulators
A novel immunogenic cell death-related gene risk signature can identify biomarkers of gliomas and predict the immunotherapeutic response	Xuewu Tang et al.	2024	American journal of cancer research	38323285	10.62347/VCFG8784	Immunogenic cell death
Prognostic characterization of the pyroptosis-related subtypes and tumor microenvironment infiltration in glioma	Jiarong He et al.	2023	Cancer Biomarkers	37248887	10.3233/CBM-220362	Pyroptosis
Identification and validation of a 17-gene signature to improve the survival prediction of gliomas	Shiao Tong et al.	2022	Frontiers in Immunology	36248799	10.3389/fimmu.2022.1000396	Immune response
Identification of a Novel Gene Signature Based on Kinesin Family Members to Predict Prognosis in Glioma	Dongxiao Pan et al.	2023	Medicina	36837615	10.3390/medicina59020414	Kinesin Family Members
Prognostic value of m6A regulators and the nomogram construction in glioma patients	Pengdi Liu et al.	2022	Medicine (Baltimore)	36123877	10.1097/MD.0000000000030643	m6A regulators
A novel cuproptosis-related gene signature to predict prognosis in Glioma	Mengyang Zhang et al.	2023	BMC Cancer	36915038	10.1186/s12885-023-10714-8	Cuproptosis
Characterization of Hypoxia Signature to Evaluate the Tumor Immune Microenvironment and Predict Prognosis in Glioma Groups	Wanzun Lin et al.	2020	Frontiers in Oncology	32500034	10.3389/fonc.2020.00796	Hypoxia
The evaluation of six genes combined value in glioma diagnosis and prognosis	Ping Lin et al.	2023	Journal of Cancer Research and Clinical Oncology	37439825	10.1007/s00432-023-05082-6	None
N6-methyladenine-related genes affect biological behavior and the prognosis of glioma	Shanqiang Qu et al.	2021	Cancer Medicine	33264518	10.1002/cam4.3574	N6-methyladenine
Identification of RNA: 5-Methylcytosine Methyltransferases-Related Signature for Predicting Prognosis in Glioma	Peng Wang et al.	2020	Frontiers in Oncology	32974125	10.3389/fonc.2020.01119	RNA:m5C methyltransferases
Establishment and validation of five autophagy-related signatures for predicting survival and immune microenvironment in glioma	Zijun Zhao et al.	2022	Genes Genomics	34609723	10.1007/s13258-021-01172-2	Autophagy
An Autophagy-Related Gene Signature Associated With Clinical Prognosis and Immune Microenvironment in Gliomas	Yang Xu et al.	2020	Frontiers in Oncology	33194668	10.3389/fonc.2020.571189	Autophagy
Identification of a 6-RBP gene signature for a comprehensive analysis of glioma and ischemic stroke: Cognitive impairment and aging-related hypoxic stress	Weiwei Lin et al.	2022	Frontiers in aging neuroscience	36118697	10.3389/fnagi.2022.951197	RNA-binding protein
Predicting the prognosis of glioma by pyroptosis-related signature	Bo Chao et al.	2022	Journal of Cellular and Molecular Medicine	34816605	10.1111/jcmm.17061	Pyroptosis
The study of an anoikis-related signature to predict glioma prognosis and immune infiltration	Dongdong Zhang et al.	2023	Journal of Cancer Research and Clinical Oncology	37450027	10.1007/s00432-023-05138-7	Anoikis
Identification of a Nomogram with an Autophagy-Related Risk Signature for Survival Prediction in Patients with Glioma	Xiaofeng Fu et al.	2022	International Journal of General Medicine	35210825	10.2147/IJGM.S335571	Autophagy
Identification of a tripartite motif family gene signature for predicting the prognosis of patients with glioma	Sheng Xiao et al.	2022	American journal of translational research	35422900	2023 Jan 15;15(1):288-309	Tripartite motif family
Comprehensive Analysis of Pyroptosis-Associated in Molecular Classification, Immunity and Prognostic of Glioma	Peng Chen et al.	2022	Frontiers in genetics	35069683	10.3389/fgene.2021.781538	Pyroptosis
Prognosis prediction and tumor immune microenvironment characterization based on tryptophan metabolism-related genes signature in brain glioma	Shuxin Zhang et al.	2022	Frontiers in pharmacology	36386216	10.3389/fphar.2022.1061597	tryptophan metabolism
Identification of a Fibroblast-Related Prognostic Model in Glioma Based on Bioinformatics Method	Haofuzi Zhang et al.	2022	Biomolecules	36358948	10.3390/biom12111598	Fibroblast
A prognostic NAD+ metabolism-related gene signature for predicting response to immune checkpoint inhibitor in glioma	Cheng Jiang et al.	2023	Frontiers in Oncology	36845744	10.3389/fonc.2023.1051641	NAD+ metabolism
Lipid metabolism-related gene signature predicts prognosis and depicts tumor microenvironment immune landscape in gliomas	Junhong Li et al.	2023	Frontiers in Immunology	36860853	10.3389/fimmu.2023.1021678	Lipid metabolism
Establishment of an Immune-Related Gene Signature for Risk Stratification for Patients with Glioma	Jimin He et al.	2021	Computational and Mathematical Methods in Medicine	34497663	10.1155/2021/2191709	Immune
Identification and Validation of an Immune-Associated RNA-Binding Proteins Signature to Predict Clinical Outcomes and Therapeutic Responses in Glioma Patients	Ruotong Tian et al.	2021	Cancers (Basel)	33917399	10.3390/cancers13071730	Immune-Associated RNA-Binding Proteins
Prognosis prediction based on methionine metabolism genes signature in gliomas	Sujin Zhou et al.	2023	BMC medical genomics	38057821	10.1186/s12920-023-01754-x	Methionine metabolism
Development of stemness-related signature to optimize prognosis prediction and identify XMD8-85 as a novel therapeutic compound for glioma	Wanxiang Niu et al.	2024	Cellular signalling	38768760	10.1016/j.cellsig.2024.111231	Stemness
A novel chemokine-based signature for prediction of prognosis and therapeutic response in glioma	Wenhua Fan et al.	2022	CNS Neuroscience & Therapeutics	35985661	10.1111/cns.13944	Chemokine
Integrative Analysis of Inflammatory Response-Related Gene for Predicting Prognosis and Immunotherapy in Glioma	Zhen Zhao et al.	2023	Journal of Molecular Neuroscience	37488455	10.1007/s12031-023-02142-x	Inflammatory response
Characterization of Fatty Acid Metabolism-Related Genes Landscape for Predicting Prognosis and Aiding Immunotherapy in Glioma Patients	Feng Jiang et al.	2022	Frontiers in Immunology	35903107	10.3389/fimmu.2022.902143	Fatty Acid Metabolism
Signature Construction and Disulfidptosis-Related Molecular Cluster Identification for Better Prediction of Prognosis in Glioma	Yekun Zhuang et al.	2024	Journal of Molecular Neuroscience	38573391	10.1007/s12031-024-02216-4	Disulfidptosis
Novel prognostic features and personalized treatment strategies for mitochondria-related genes in glioma patients	Ji Wu et al.	2023	Frontiers in Endocrinology	37091853	10.3389/fendo.2023.1172182	Mitochondrial
Pyroptosis-Related Gene Signature Predicts Prognosis and Indicates Immune Microenvironment Infiltration in Glioma	Yulian Zhang et al.	2022	Frontiers in Cell and Developmental Biology	35547808	10.3389/fcell.2022.862493	Pyroptosis
Serine and glycine metabolism-related gene expression signature stratifies immune profiles of brain gliomas, and predicts prognosis and responses to immunotherapy	Siliang Chen et al.	2022	Frontiers in pharmacology	36467068	10.3389/fphar.2022.1072253	Serine and glycine metabolism
Autophagy-Dependent Ferroptosis-Related Signature is Closely Associated with the Prognosis and Tumor Immune Escape of Patients with Glioma	Wenjie Sun et al.	2022	International Journal of General Medicine	35023963	10.2147/IJGM.S343046	Autophagy
Identification and Validation of an 11-Ferroptosis Related Gene Signature and Its Correlation With Immune Checkpoint Molecules in Glioma	Zhuohui Chen et al.	2021	Frontiers in Cell and Developmental Biology	34249910	10.3389/fcell.2021.652599	Ferroptosis
Identification of an Inflammatory Response-Related Gene Signature to Predict Survival and Immune Status in Glioma Patients	Zhaoyue Yan et al.	2022	Journal of Immunology Research	35647198	10.1155/2022/8972730	Inflammatory Response
A Prognostic DNA Damage Repair Genes Signature and Its Impact on Immune Cell Infiltration in Glioma	Guohui Wang et al.	2021	Frontiers in Oncology	34123852	10.3389/fonc.2021.682932	DNA Damage Repair
Development of Autophagy Signature-Based Prognostic Nomogram for Refined Glioma Survival Prognostication	Yuxiang Fan et al.	2020	BioMed Research International	32964017	10.1155/2020/1872962	Autophagy
A novel prognostic signature of cuproptosis-related genes and the prognostic value of FDX1 in gliomas	HuaXin Zhu et al.	2022	Frontiers in genetics	36579333	10.3389/fgene.2022.992995	Cuproptosis
Uronic acid metabolic process-related gene expression-based signature predicts overall survival of glioma	Yuemei Feng et al.	2021	Bioscience reports	33324981	10.1042/BSR20203051	Uronic acid metabolic process
Interferon gamma-related gene signature based on anti-tumor immunity predicts glioma patient prognosis	Zhe Zhang et al.	2023	Frontiers in genetics	36712869	10.3389/fgene.2022.1053263	Interferon gamma
A novel DNA damage and repair-related gene signature to improve predictive capacity of overall survival for patients with gliomas	Xiaodong Li et al.	2022	Journal of Cellular and Molecular Medicine	35615996	10.1111/jcmm.17406	DNA damage and repair
Characterization of an endoplasmic reticulum stress-related signature to evaluate immune features and predict prognosis in glioma	Qing Zhang et al.	2021	Journal of Cellular and Molecular Medicine	33611848	10.1111/jcmm.16321	Endoplasmic reticulum stress
Aggrephagy-related gene signature correlates with survival and tumor-associated macrophages in glioma: Insights from single-cell and bulk RNA sequencing	Xiaowei Zhang et al.	2024	Mathematical Biosciences and Engineering	38454689	10.3934/mbe.2024106	Aggrephagy
Identification and validation of an ECM organization-related gene signature as a prognostic biomarker and therapeutic target for glioma patients	Qiong Zhong et al.	2023	Genes Genomics	37301776	10.1007/s13258-023-01413-6	Extracellular matrix
Identifying the Predictive Role of Oxidative Stress Genes in the Prognosis of Glioma Patients	Di Lu et al.	2021	Medical Science Monitor	34836934	10.12659/MSM.934161	Oxidative Stress
Construction and validation of an angiogenesis-related gene expression signature associated with clinical outcome and tumor immune microenvironment in glioma	Tianhao Hu et al.	2022	Frontiers in genetics	36035133	10.3389/fgene.2022.934683	Angiogenesis
A Pyroptosis-Related Gene Signature Associated with Prognosis and Tumor Immune Microenvironment in Gliomas	Zunjie Zhou et al.	2022	International Journal of General Medicine	35571289	10.2147/IJGM.S353762	Pyroptosis
Comprehensive profiling identifies a novel signature with robust predictive value and reveals the potential drug resistance mechanism in glioma	Fan Zeng et al.	2020	Cell Communicationand Signaling	31907037	10.1186/s12964-019-0492-6	Chemoresistance
Glycosylation modification identifies novel molecular phenotypes and prognostic stratifications of glioma	Chaofan Wang et al.	2022	Gene	35714799	10.1016/j.gene.2022.146677	Glycosylation modification
Prognosis and therapeutic significance of IGF-1R-related signaling pathway gene signature in glioma	Zhen Liu et al.	2024	Frontiers in Cell and Developmental Biology	38665430	10.3389/fcell.2024.1375030	IGF-1R-related signaling pathway
A pyroptosis-related signature predicts prognosis and indicates immune microenvironment infiltration in glioma	Jia Chen et al.	2023	Cancer Medicine	36161280	10.1002/cam4.5247	Pyroptosis
Identification of M5c regulator-medicated methylation modification patterns for prognosis and immune microenvironment in glioma	Zhenyong Xiao et al.	2023	Aging (Albany NY)	37934565	10.18632/aging.205179	m5C RNA modification
The disulfidptosis-related signature predicts prognosis and immune features in glioma patients	Xiong Wang et al.	2023	Scientific reports	37864127	10.1038/s41598-023-45295-w	Disulfidptosis
Constructing a signature based on the SIRT family to help the prognosis and treatment sensitivity in glioma patients	Feiyue Xuan et al.	2022	Frontiers in genetics	36568393	10.3389/fgene.2022.1035368	SIRT family
Clinical and Biological Significance of a Necroptosis-Related Gene Signature in Glioma	Zunjie Zhou et al.	2022	Frontiers in Oncology	35719998	10.3389/fonc.2022.855434	Necroptosis
MAPK signaling pathway-based glioma subtypes, machine-learning risk model, and key hub proteins identification	Hengrui Liu et al.	2023	Scientific reports	37925483	10.1038/s41598-023-45774-0	MAPK signaling pathway
A novel hypoxia-driven gene signature that can predict the prognosis and drug resistance of gliomas	Peng Ren et al.	2022	Frontiers in genetics	36118887	10.3389/fgene.2022.976356	Hypoxia
Molecular Subtypes Based on the Stemness Index Predict Prognosis in Glioma Patients	Jun Tan et al.	2021	Frontiers in genetics	33732284	10.3389/fgene.2021.616507	Stemness index
Prognostic value of cuproptosis-related genes signature and its impact on the reshaped immune microenvironment of glioma	Siliang Chen et al.	2022	Frontiers in pharmacology	36267281	10.3389/fphar.2022.1016520	Cuproptosis
A Novel S100 Family-Based Signature Associated with Prognosis and Immune Microenvironment in Glioma	Yifang Hu et al.	2021	Journal of Oncology	34712325	10.1155/2021/3586589	S100 Family
A Hypoxia-Associated Prognostic Gene Signature Risk Model and Prognosis Predictors in Gliomas	Feng Gao et al.	2021	Frontiers in Oncology	34868920	10.3389/fonc.2021.726794	Hypoxia
Identification and validation of RNA-binding protein-related gene signature revealed potential associations with immunosuppression and drug sensitivity in glioma	Zhuohui Chen et al.	2021	Cancer Medicine	34482648	10.1002/cam4.4248	RNA-binding protein
Systematic and Multi-Omics Prognostic Analysis of Lysine Acetylation Regulators in Glioma	Zewei Tu et al.	2021	Frontiers in molecular biosciences	33718432	10.3389/fmolb.2021.587516	Lysine Acetylation Regulators
Development and validation of a pyroptosis-related genes signature for risk stratification in gliomas	Penggang Sun et al.	2023	Frontiers in genetics	36861130	10.3389/fgene.2023.1087563	Pyroptosis
A Novel Prognostic Signature Based on Glioma Essential Ferroptosis-Related Genes Predicts Clinical Outcomes and Indicates Treatment in Glioma	Debo Yun et al.	2022	Frontiers in Oncology	35756689	10.3389/fonc.2022.897702	Ferroptosis
Pyroptosis: a novel signature to predict prognosis and immunotherapy response in gliomas	Guiying He et al.	2022	Human Cell	36129672	10.1007/s13577-022-00791-5	Pyroptosis
A Novel Defined Pyroptosis-Related Gene Signature for Predicting Prognosis and Treatment of Glioma	Zhihao Yang et al.	2022	Frontiers in Oncology	35433410	10.3389/fonc.2022.717926	Pyroptosis
Prognostic value of lactate metabolism-related gene expression signature in adult primary gliomas and its impact on the tumor immune microenvironment	Zhihao Wang et al.	2022	Frontiers in Oncology	36203434	10.3389/fonc.2022.1008219	Lactate metabolism
The cuproptosis-related signature associated with the tumor environment and prognosis of patients with glioma	Weichen Wang et al.	2022	Frontiers in Immunology	36110851	10.3389/fimmu.2022.998236	Cuproptosis
Purine metabolism-related gene expression signature predicts survival outcome and indicates immune microenvironment profile of gliomas	Siliang Chen et al.	2022	Frontiers in pharmacology	36438805	10.3389/fphar.2022.1038272	Purine metabolism
A Focal Adhesion-Related Gene Signature Predicts Prognosis in Glioma and Correlates With Radiation Response and Immune Microenvironment	Haonan Li et al.	2021	Frontiers in Oncology	34631528	10.3389/fonc.2021.698278	Focal Adhesion
A Novel Signature Constructed by RNA-Binding Protein Coding Genes to Improve Overall Survival Prediction of Glioma Patients	Zewei Tu et al.	2021	Frontiers in Cell and Developmental Biology	33634092	10.3389/fcell.2020.588368	RNA-Binding Protein
A Novel Prognostic Tool for Glioma Based on Enhancer RNA-Regulated Immune Genes	Wei Tian et al.	2022	Frontiers in Cell and Developmental Biology	35127714	10.3389/fcell.2021.798445	Enhancer RNAs
The PANoptosis-related signature indicates the prognosis and tumor immune infiltration features of gliomas	Jingjing Song et al.	2023	Frontiers in Molecular Neuroscience	37501725	10.3389/fnmol.2023.1198713	PANoptosis
A Novel Risk Signature with Seven Pyroptosis-Related Genes for Prognosis Prediction in Glioma	Qianrong Huang et al.	2022	World neurosurgery	34929369	10.1016/j.wneu.2021.12.042	Pyroptosis
Differences of macrophages in the tumor microenvironment as an underlying key factor in glioma patients	Yangyang Wang et al.	2022	Frontiers in Immunology	36389681	10.3389/fimmu.2022.1028937	Macrophages
A novel pyroptosis-related gene signature predicts the prognosis of glioma through immune infiltration	Moxuan Zhang et al.	2021	BMC Cancer	34876094	10.1186/s12885-021-09046-2	Pyroptosis
New Autophagy-Ferroptosis Gene Signature Predicts Survival in Glioma	Liwei Zhou et al.	2021	Frontiers in Cell and Developmental Biology	34869322	10.3389/fcell.2021.739097	Autophagy
Natural killer cell-related gene signature predicts malignancy of glioma and the survival of patients	Chenglong Li et al.	2022	BMC Cancer	35236310	10.1186/s12885-022-09230-y	Natural killer cell
Metal ion stimulation-related gene signatures correlate with clinical and immunologic characteristics of glioma	Chengzhi Jiang et al.	2024	Heliyon	38533032	10.1016/j.heliyon.2024.e27189	Metal ion stimulation
